# Supplementary material
Source: PubMed Central journal article supplement (PMC6324171)
Supplement: NIHMS952913-supplement-Supplemental_Figures_I_-_VII.pdf [file NIHMS952913-supplement-Supplemental_Figures_I_-_VII.pdf]

# Supplemental Figure I

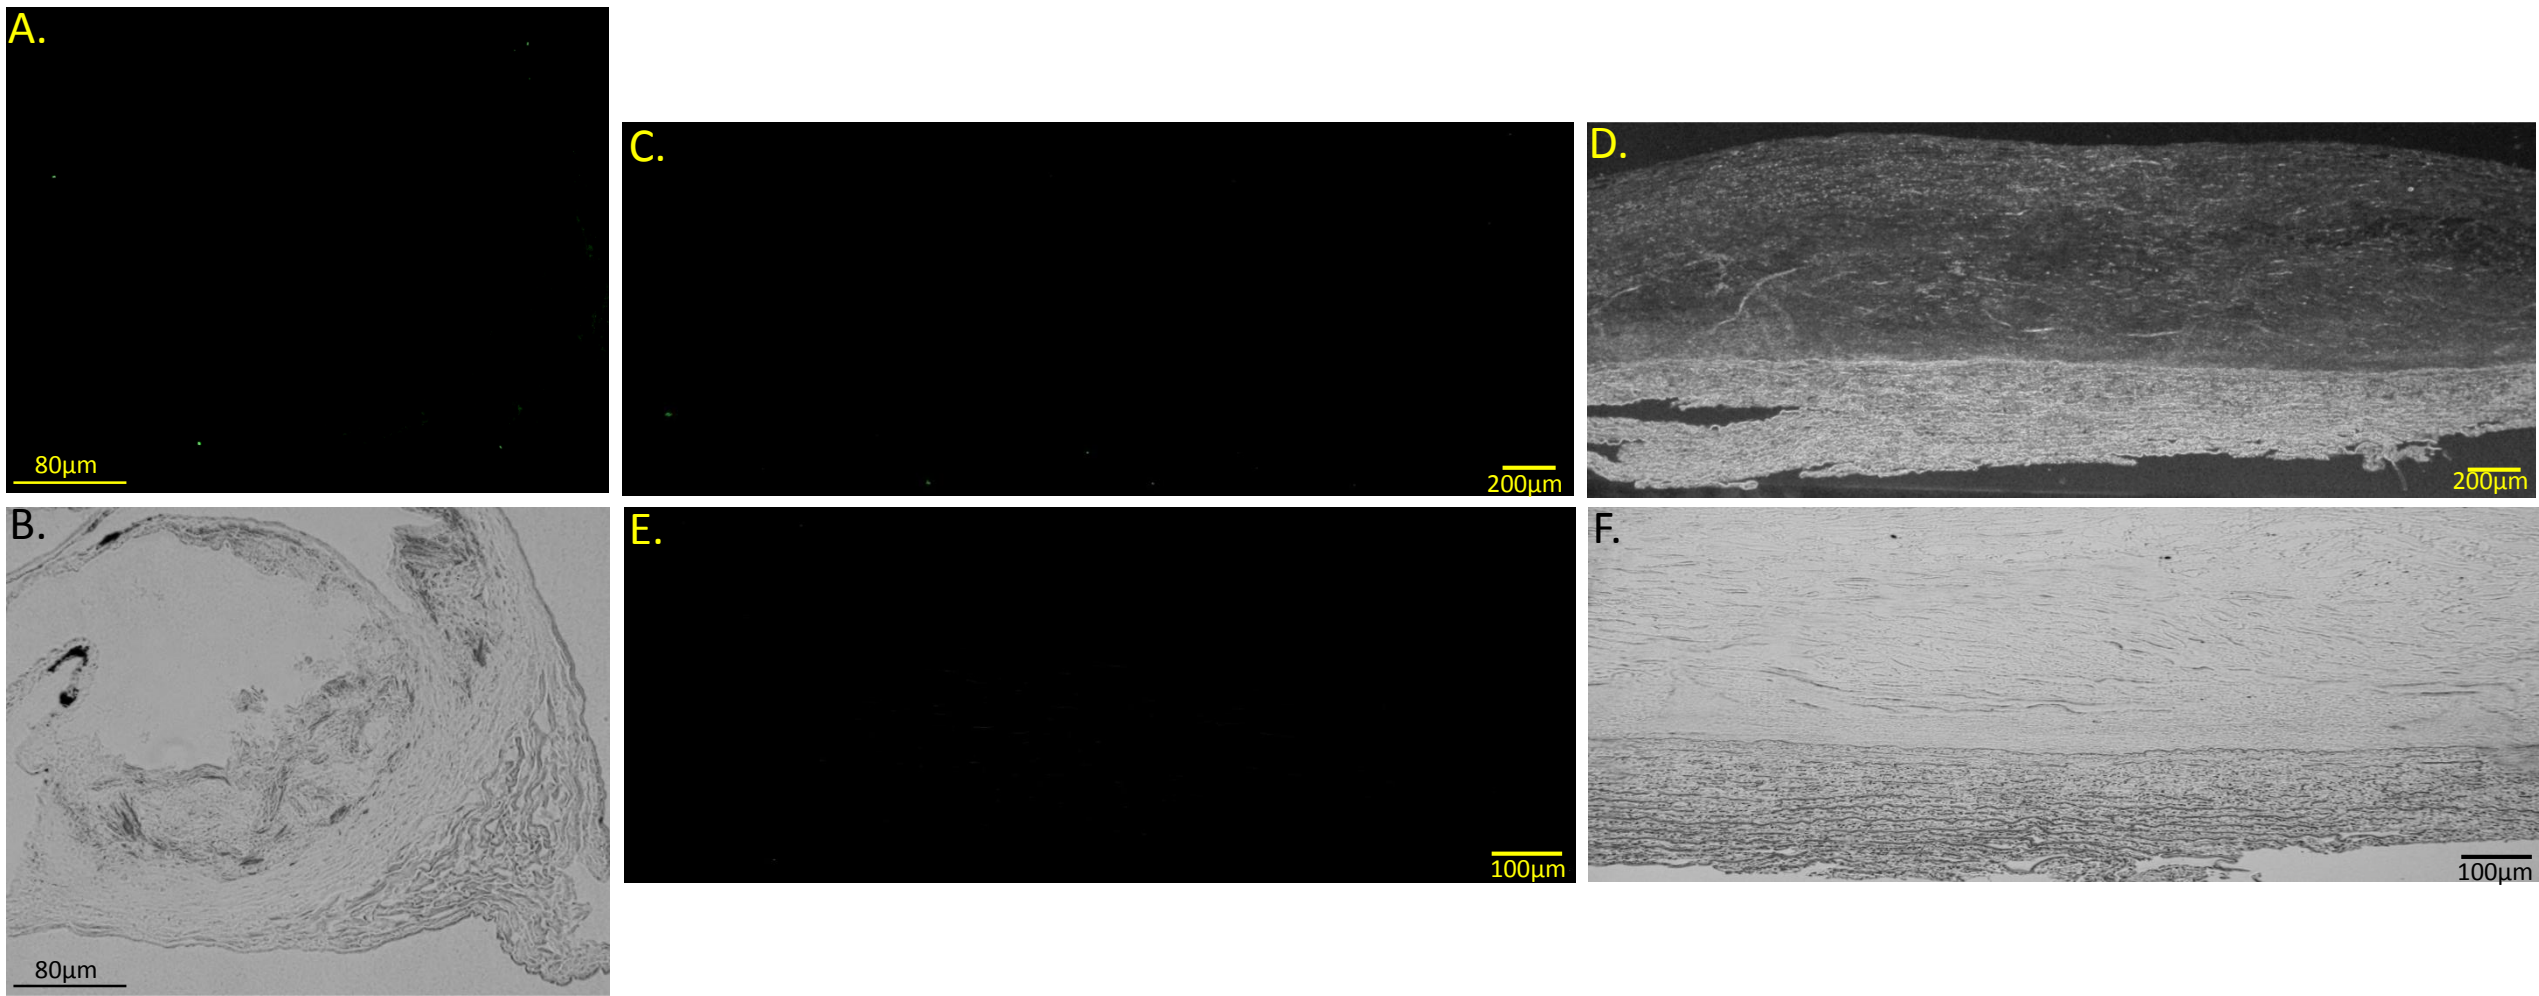

**Supplemental figure I: Control images for immunofluorescent staining.** Control immunofluorescent staining was performed on mouse atherosclerotic aortic sinus (A; 10x) and human carotid atherosclerotic lesions (C & E; 4x and 10x, respectively). Brightfield images were also taken of the sections (B; mouse aortic sinus; 10x) and (D & F; human carotid lesions; 4x and 10x, respectively). Sections underwent all staining procedures and were captured at similar settings (e.g. gain and intensity) to images in Figure 1, without primary labelled antibody.

## Supplemental Figure II

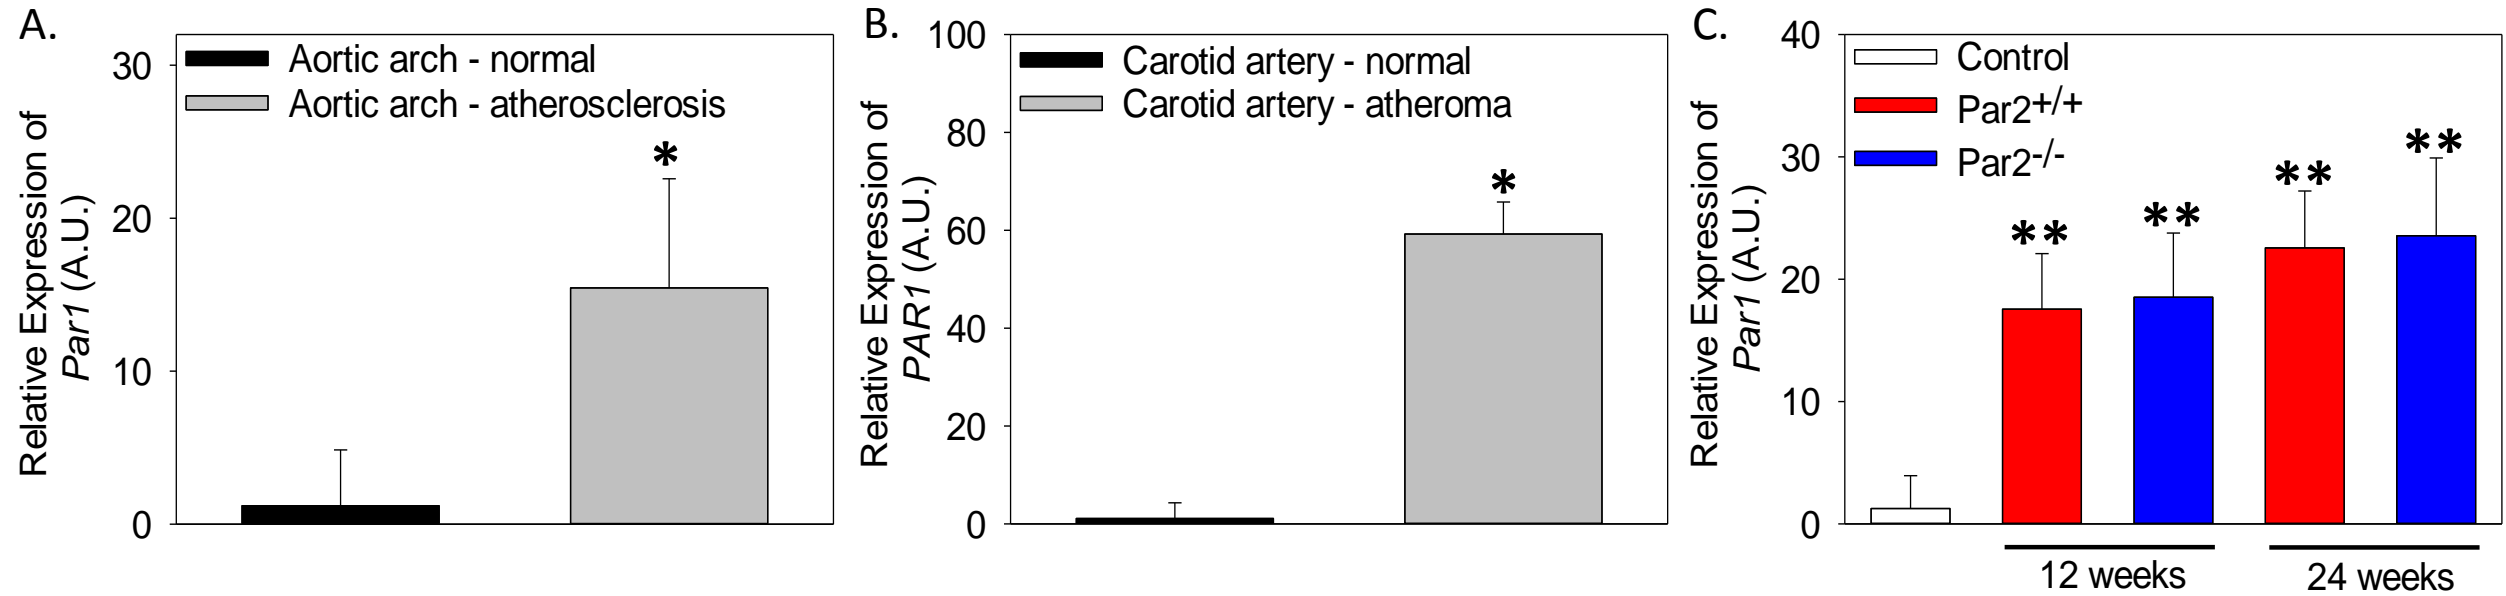

**Supplemental figure II: Expression of PAR1 mRNA is increased in the atherosclerotic lesions of mice and humans.** Normal mouse aortic arch (*Ldlr*<sup>-/-</sup> mice fed a chow ® diet for 24 weeks) or atherosclerosis-containing aortic arches (*Ldlr*<sup>-/-</sup> mice fed a 'Western' diet for 24 weeks) were examined for (A) mRNA extrapolated to normal (n = 5 individual samples/group). Normal or diseased human carotid arteries were isolated and examined for (B) mRNA extrapolated to normal (n = 5 individual samples/group). (C) The relative expression of *Par1* was also examined in *Ldlr*<sup>-/-</sup> mice that were *Par2*<sup>+/+</sup> and <sup>-/-</sup> and fed a 'Western' diet for 12 or 24 weeks. Histograms represent mean ± SEM. \* Denotes P < 0.05 for comparisons to normal aorta/artery (Two-tailed Student's t-test). \*\* Denotes P < 0.001 for comparisons to control aortic arch (One Way ANOVA on Ranks with Dunn's Post Hoc Analysis).

## Supplemental Figure III

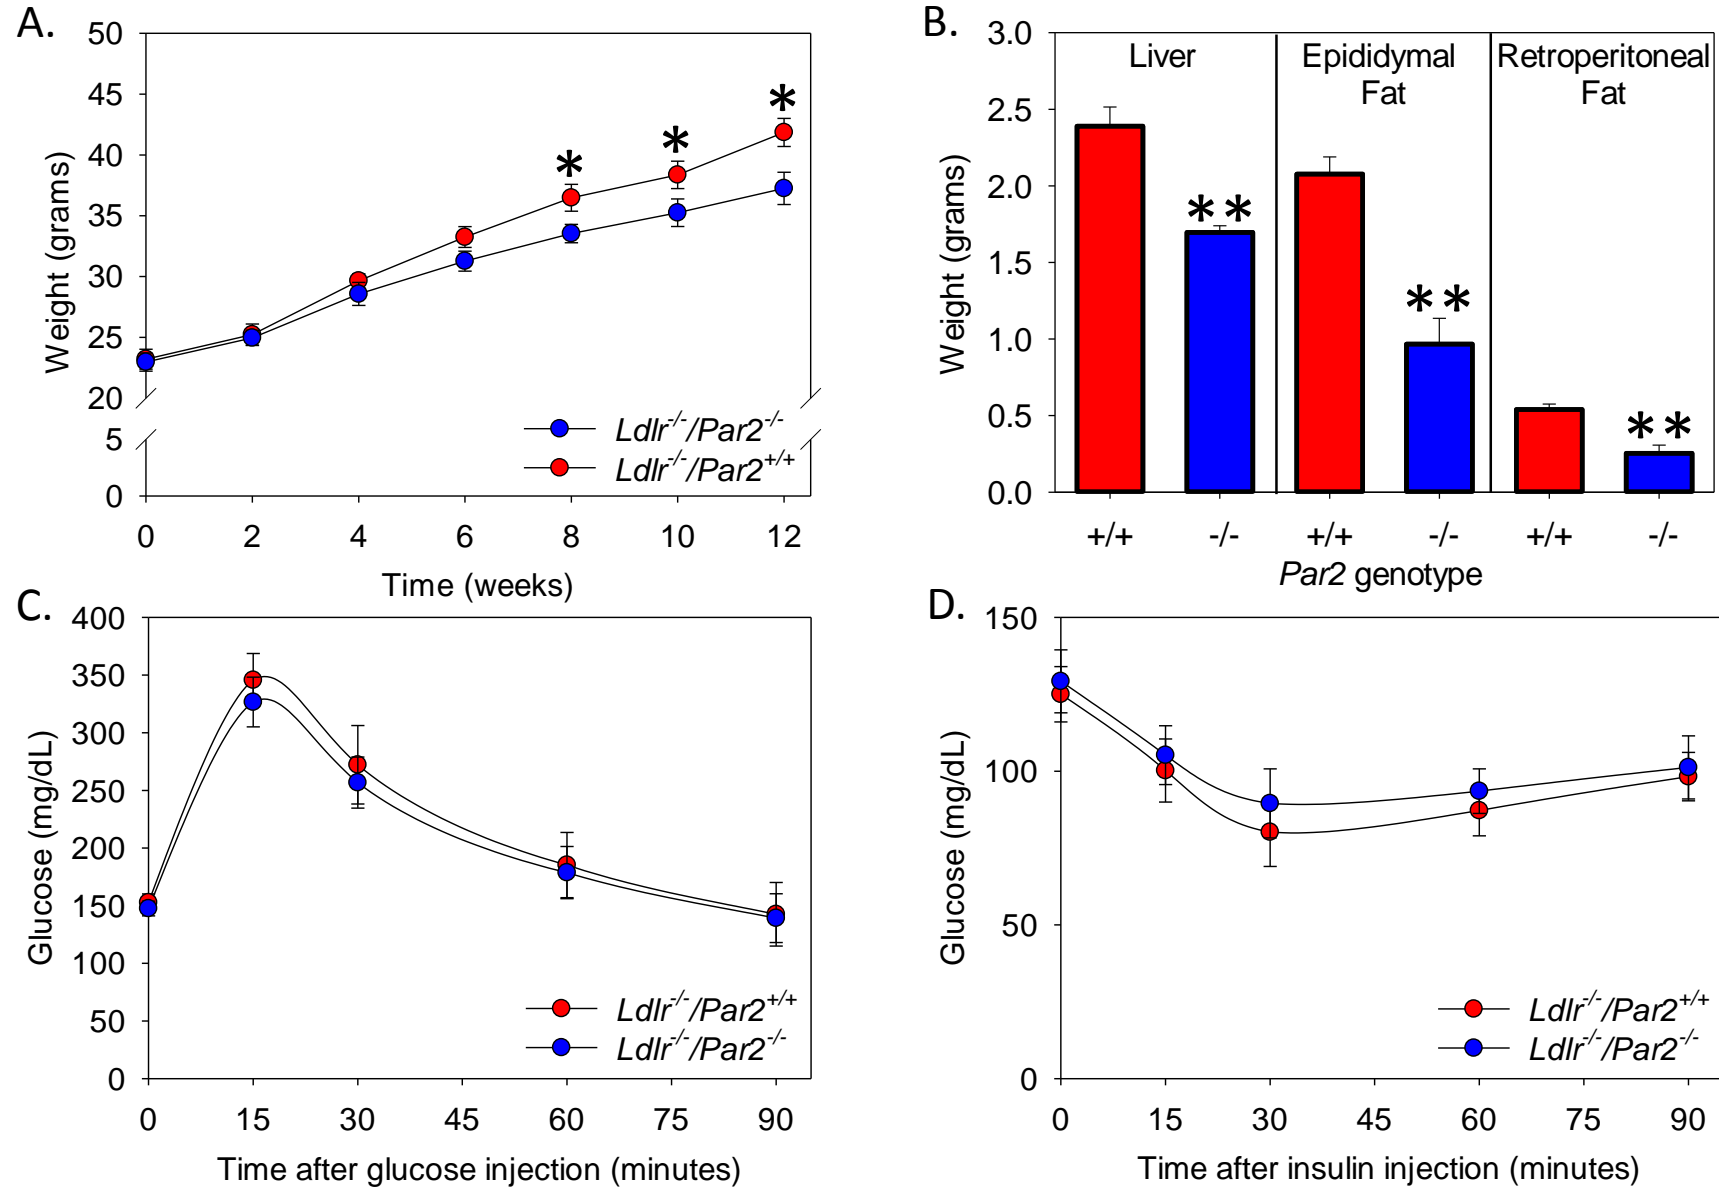

**Supplemental figure III: PAR2 deficiency reduces body and adipose weight with ‘Western’ diet.** Male *Ldlr*<sup>-/-</sup> mice that were *Par2*<sup>+/+</sup> and *-/-* (n = 16 – 30) were fed a high fat/cholesterol diet for 12 weeks. (A) Biweekly weight gain over a 12 week period. (B) Terminal liver, epididymal, and retroperitoneal fat pad weights. (C) Glucose tolerance test performed at 10 weeks of diet (n = 6 each genotype). (D) Insulin tolerance test performed at 11 weeks of diet (n = 6 each genotype). Circles represent means ± SEM. Histograms represent means ± SEM. \*P < 0.05 *+/+* versus *-/-* group (Repeated Measures ANOVA on Ranks). \*\* Denotes P < 0.01 for comparison of *-/-* to *+/+* (Two-way ANOVA on Ranks with Dunn’s Post Hoc).

## Supplemental Figure IV

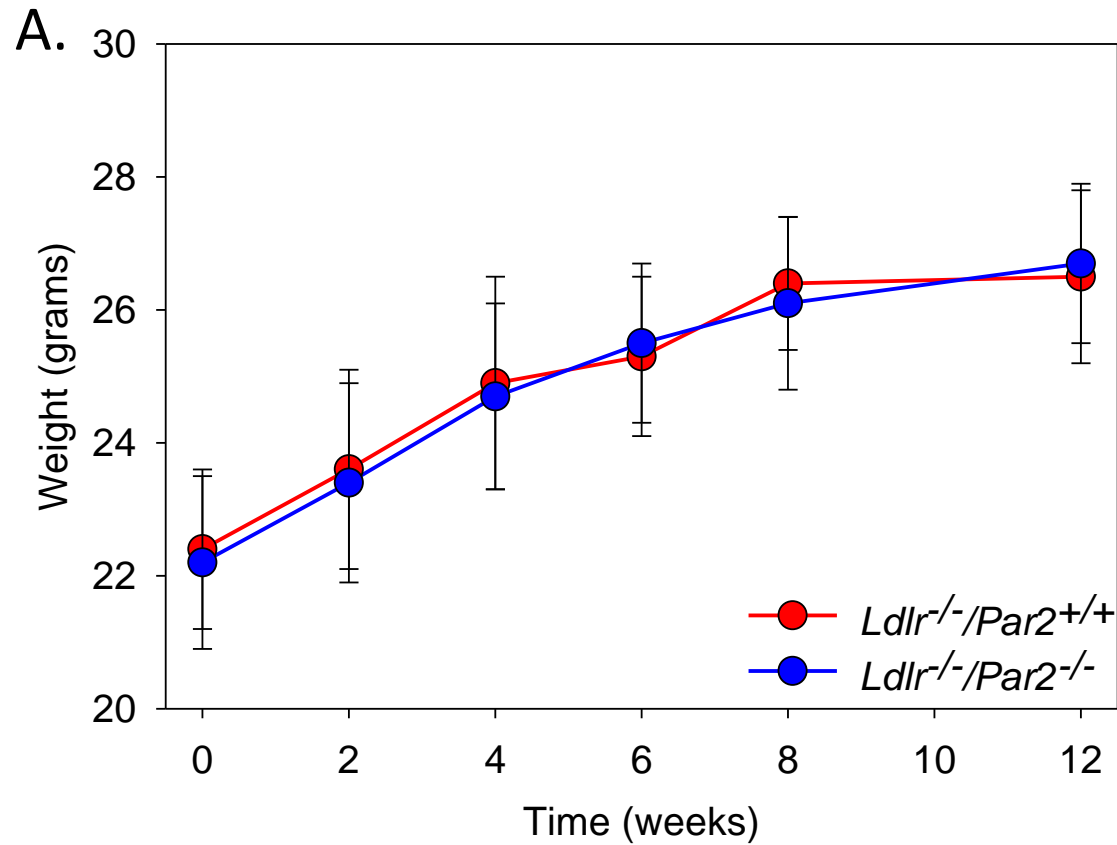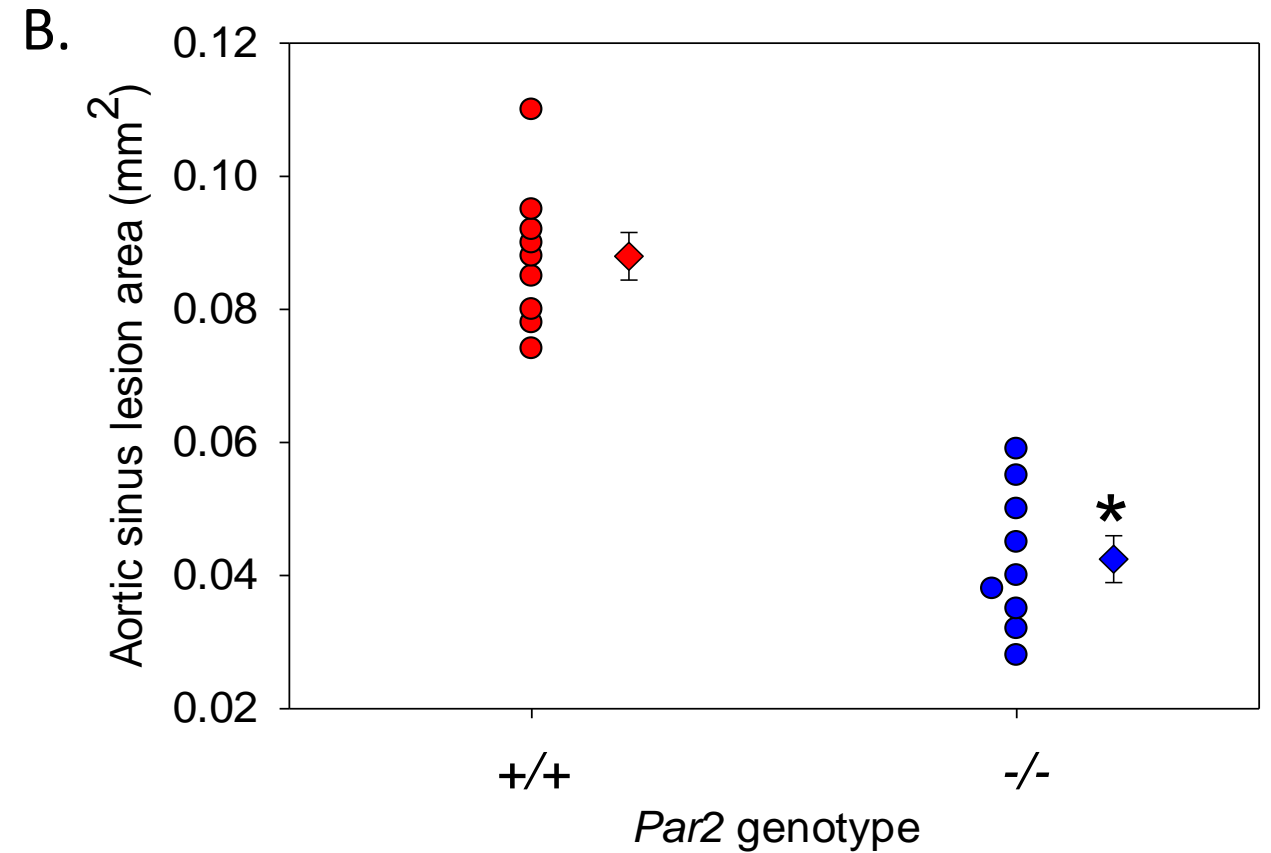

**Supplemental figure IV: PAR2 deficiency reduces atherosclerosis irrespective of body weight.** Male *Ldlr*<sup>-/-</sup> mice that were *Par2*<sup>+/+</sup> and *-/-* (n = 9 each) were fed a low-fat (4.3% fat wt/wt) modified AIN76A semisynthetic diet containing 0.15% cholesterol. (A) Biweekly weight gain in response to semisynthetic diet in *Ldlr*<sup>-/-</sup>/*Par2*<sup>+/+</sup> and *Ldlr*<sup>-/-</sup>/*Par2*<sup>-/-</sup>. Circles represent means  $\pm$  SEM. (B) Percent lesion area of the aortic sinus where circles represent individual measurements, diamonds are means  $\pm$  SEM. \* Denotes P < 0.001 for comparison of *-/-* to *+/+* (two-tailed Student's t-test).



## Supplemental Figure V

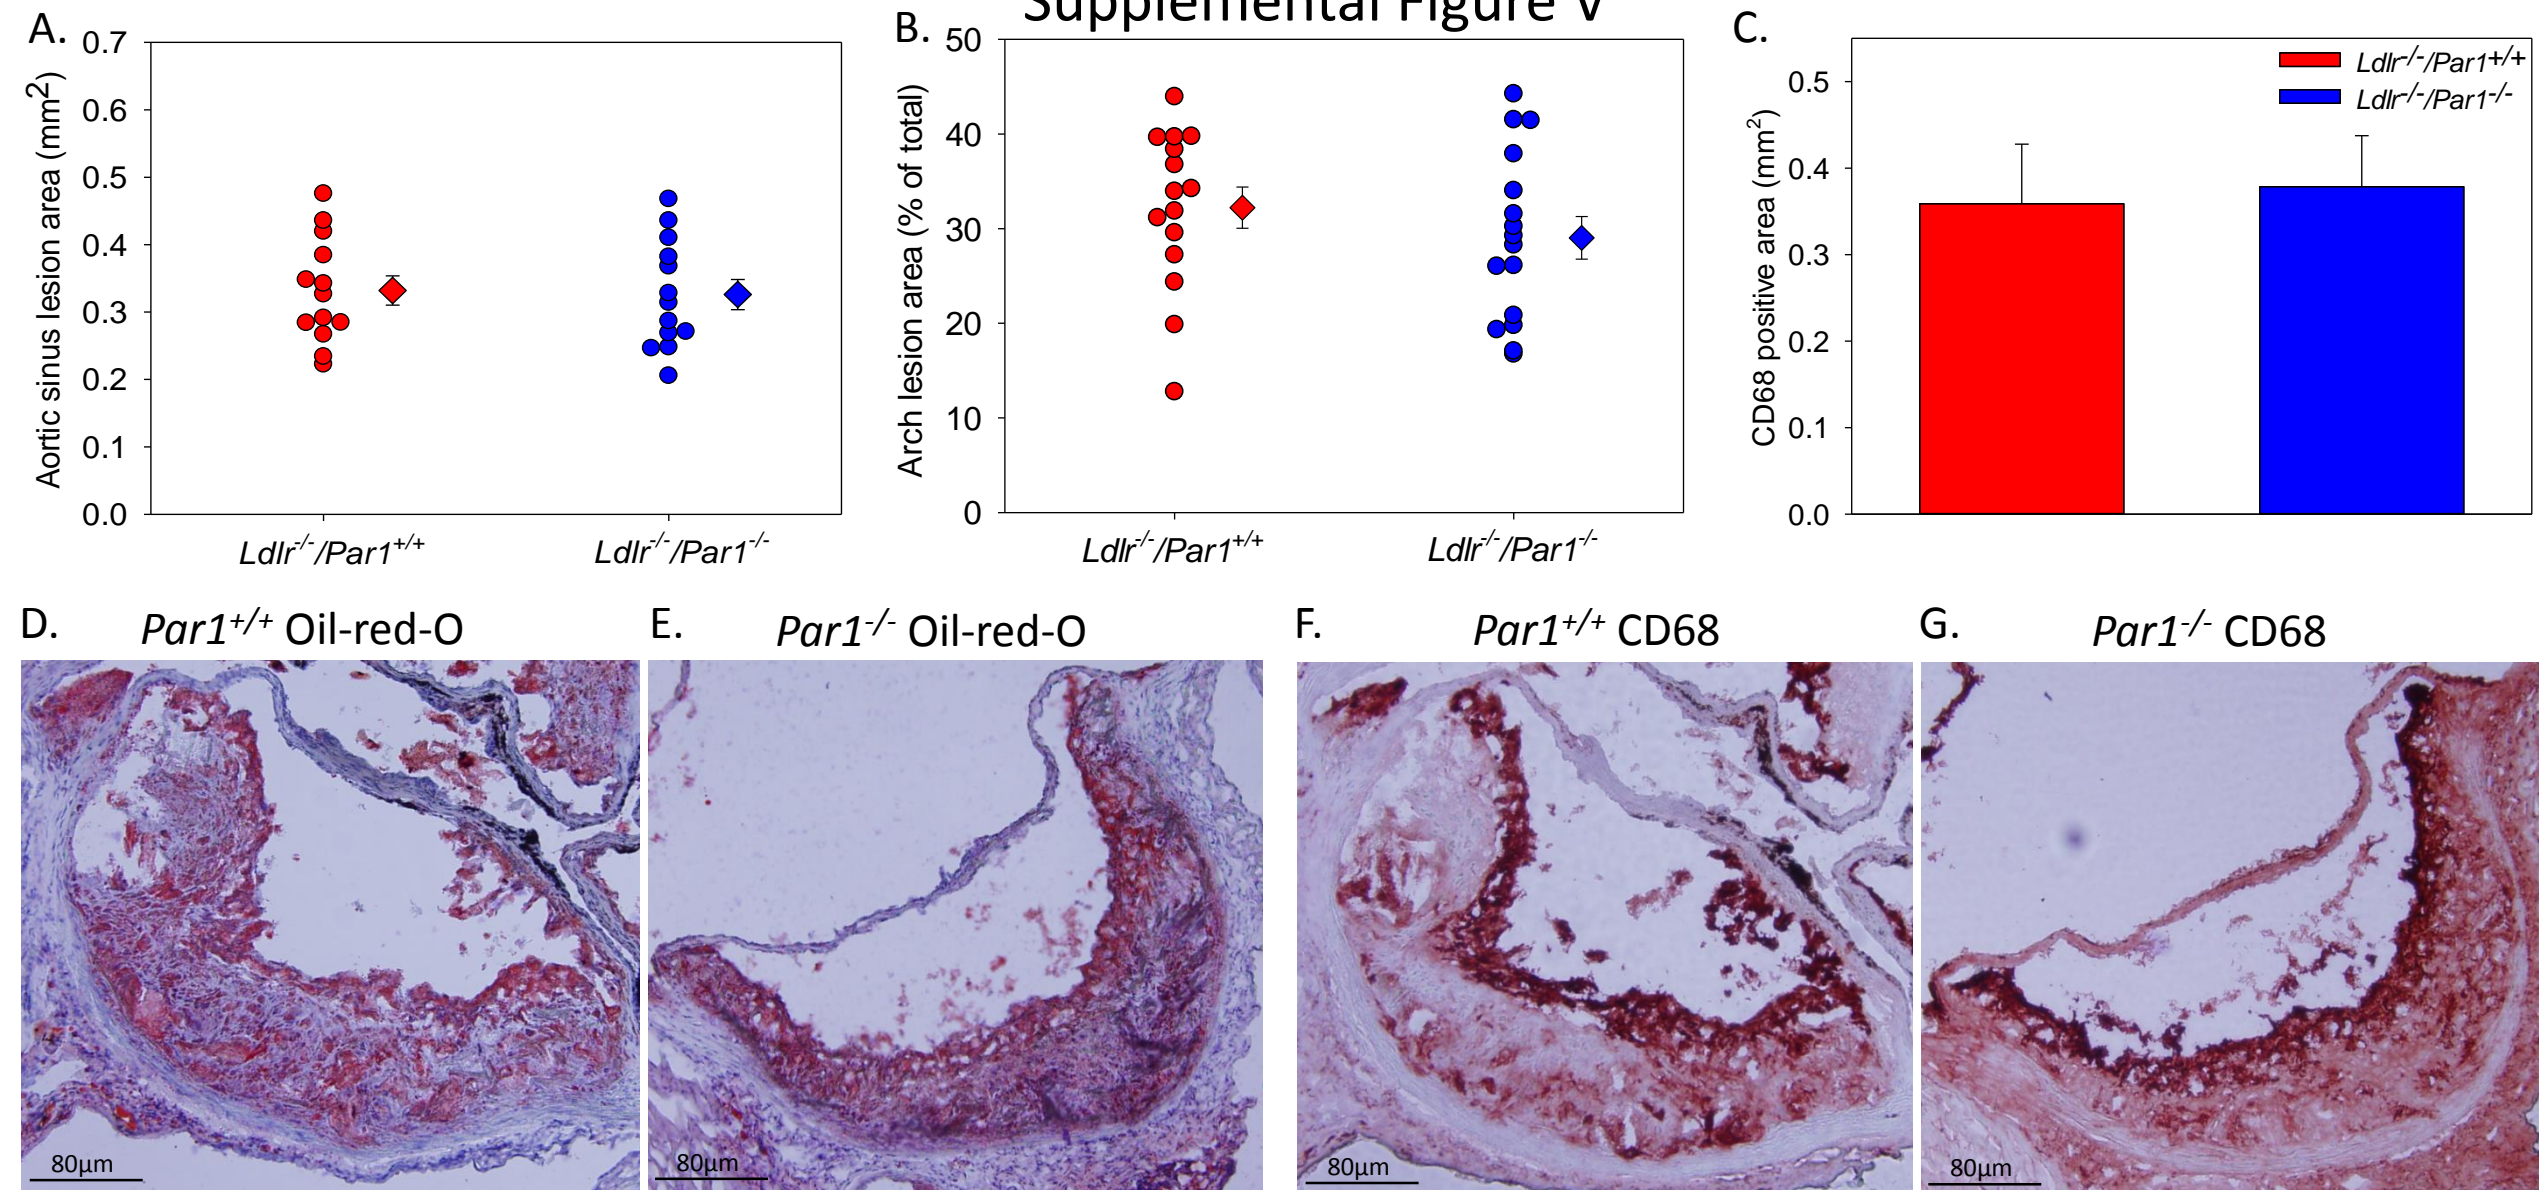

**Supplemental figure V: PAR1 deficiency does not affect the formation of early atherosclerosis.** Male *Ldlr*<sup>-/-</sup> mice that were *Par1*<sup>+/+</sup> and *-/-* (n = 15 – 16) were fed a high fat/cholesterol diet for 12 weeks. (A) Percent lesion area of the aortic sinus and (B) en face area of the aortic arch where circles represent individual measurements, diamonds are means ± SEM. (D – E) Representative images of Oil-red O stained aortic sinus and (C, F – G) representative images and quantification of (G) CD68 stained aortic sinuses.

## Supplemental Figure VI

A. Bone Marrow Transplantation Study Weights

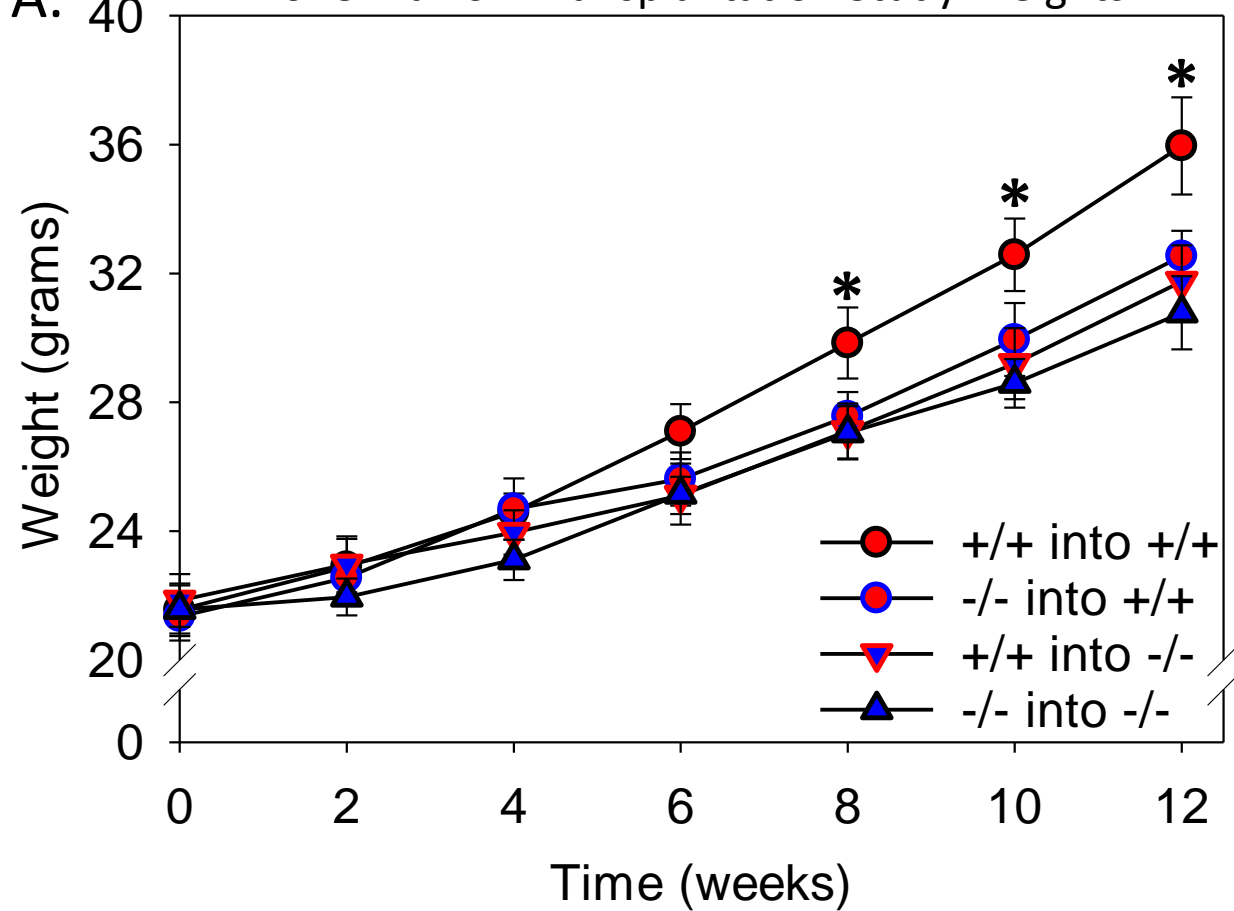

B. 24 Week Atherosclerosis Study Weights

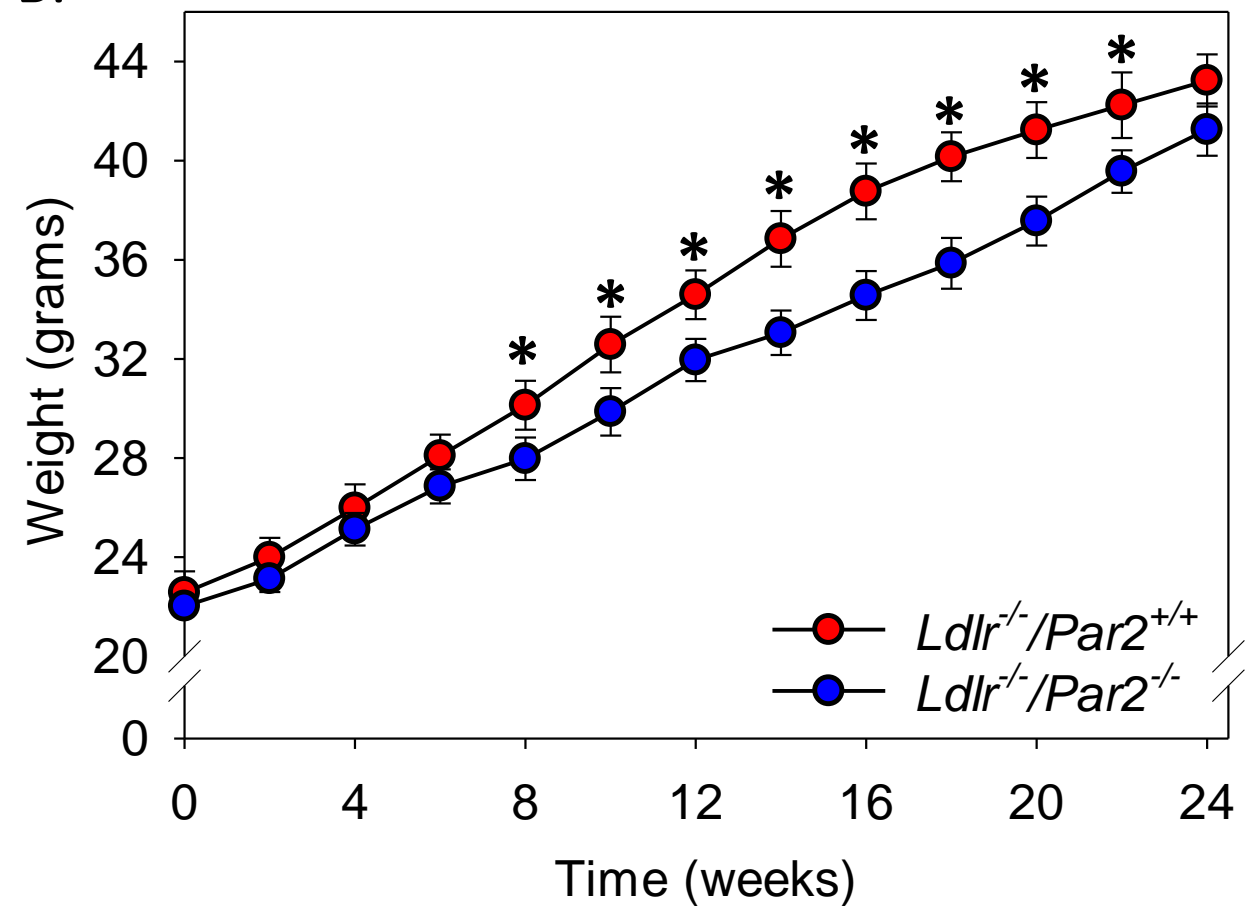

**Supplemental figure VI: PAR2 deficiency reduces weight gain in bone marrow transplant and chronic atherosclerosis.** Male *Ldlr*<sup>-/-</sup>/*Par2*<sup>+/+</sup> and *Ldlr*<sup>-/-</sup>/*Par2*<sup>-/-</sup> mice (8-10 weeks old, n = 10 – 12 each group) were irradiated (1300 rads split into two equal doses four hours apart) and repopulated with *Par2*<sup>+/+</sup> or *-/-* bone marrow. Mice were allowed to recover for 5 weeks, and then fed a Western diet for 12 weeks. (A) Biweekly weight gain of all four chimeric groups. Circles and diamonds represent means ± SEM. \*P < 0.05 +/+ into +/+ group versus all other groups. Repeated Measures ANOVA on Ranks. (B) Biweekly weights of male *Ldlr*<sup>-/-</sup> mice (8-12 weeks) that were *Par2*<sup>+/+</sup> and *-/-* (n = 12) were fed a high fat/cholesterol diet for 24 weeks. Circles represent means ± SEM. \*P < 0.05 +/+ into +/+ group versus all other groups. Repeated Measures ANOVA on Ranks.

## Supplemental Figure VII

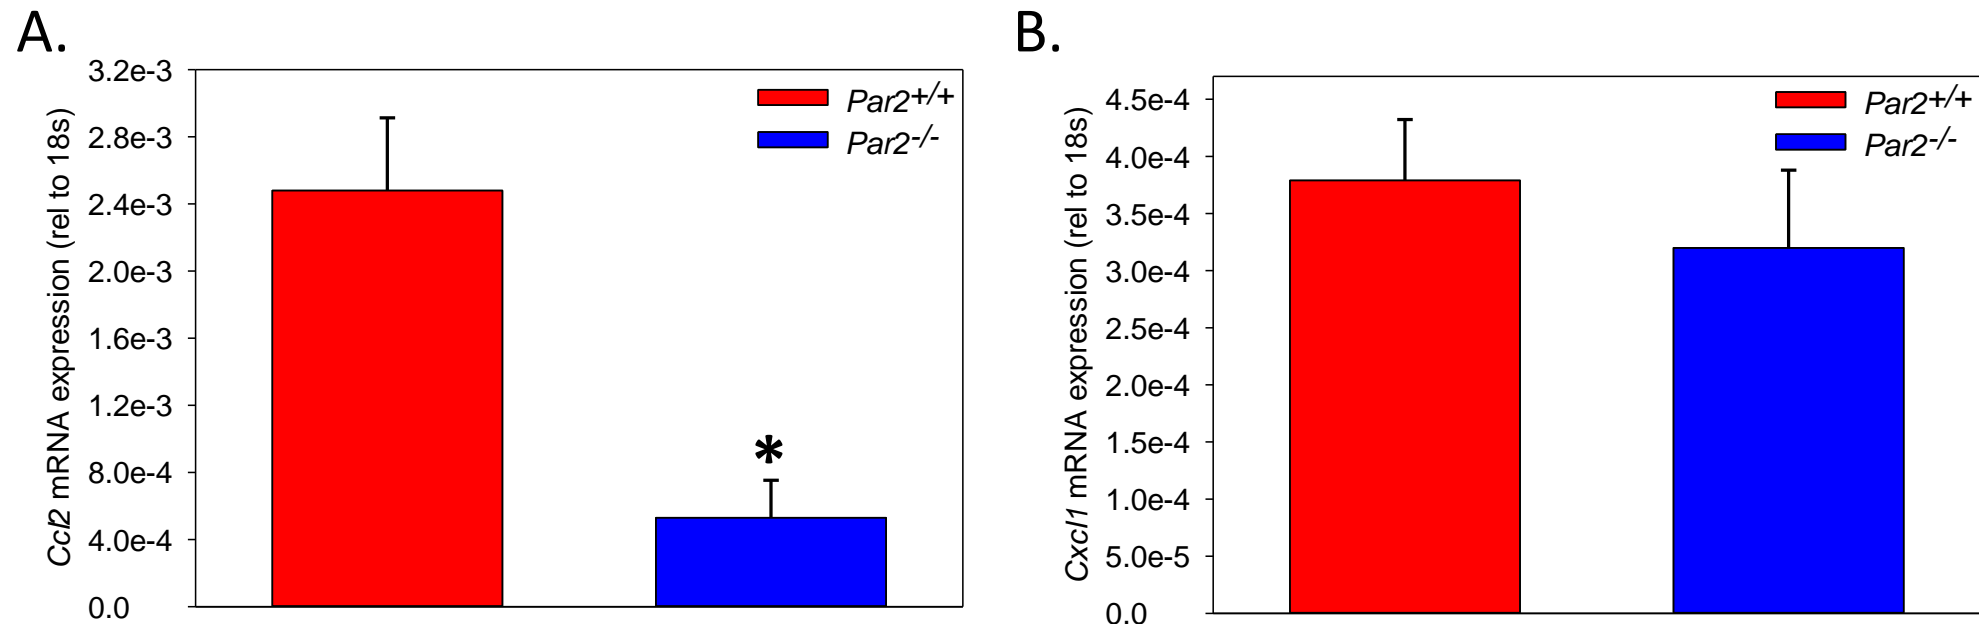

**Supplemental figure VII: Basal *Ccl2* mRNA is decreased with PAR2 deficiency.** Mouse aortic arch VSMCs were isolated from *Par2*<sup>+/+</sup> and *Par2*<sup>-/-</sup> mice (n = 10 each) and mRNA extracted. (A) *Ccl2* and (B) *Cxcl1* mRNA was quantified and extrapolated to 18S rRNA expression. Histograms represent mean ± SEM. \* Denotes P < 0.05 for comparisons of -/- to +/+ mice; Mann Whitney Rank Sum.
